# Supplementary material
Source: PubMed Central journal article supplement (PMC4864611)
Supplement: NIHMS774317-supplement-1.pdf [file NIHMS774317-supplement-1.pdf]

# Supplemental Data

## A

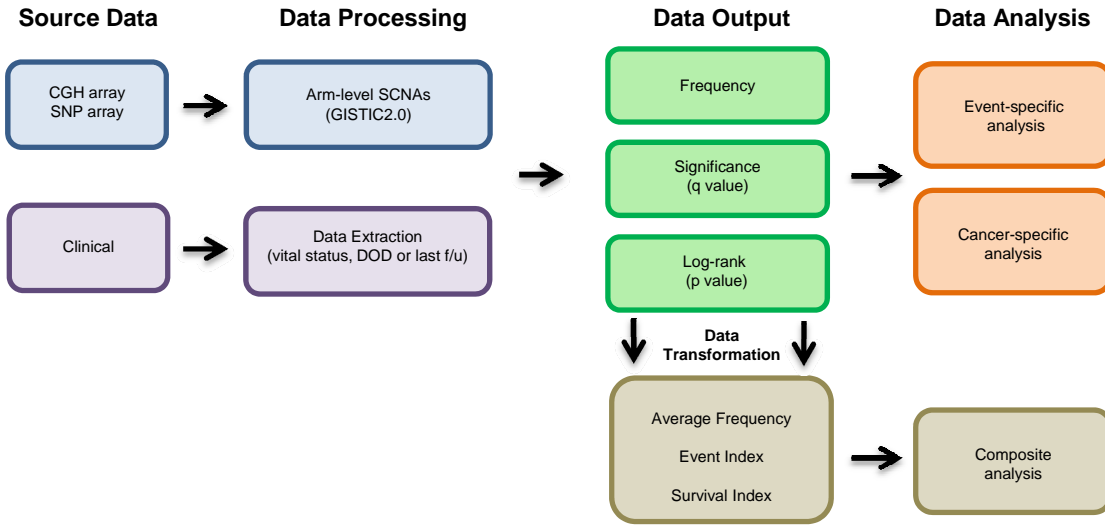

## B

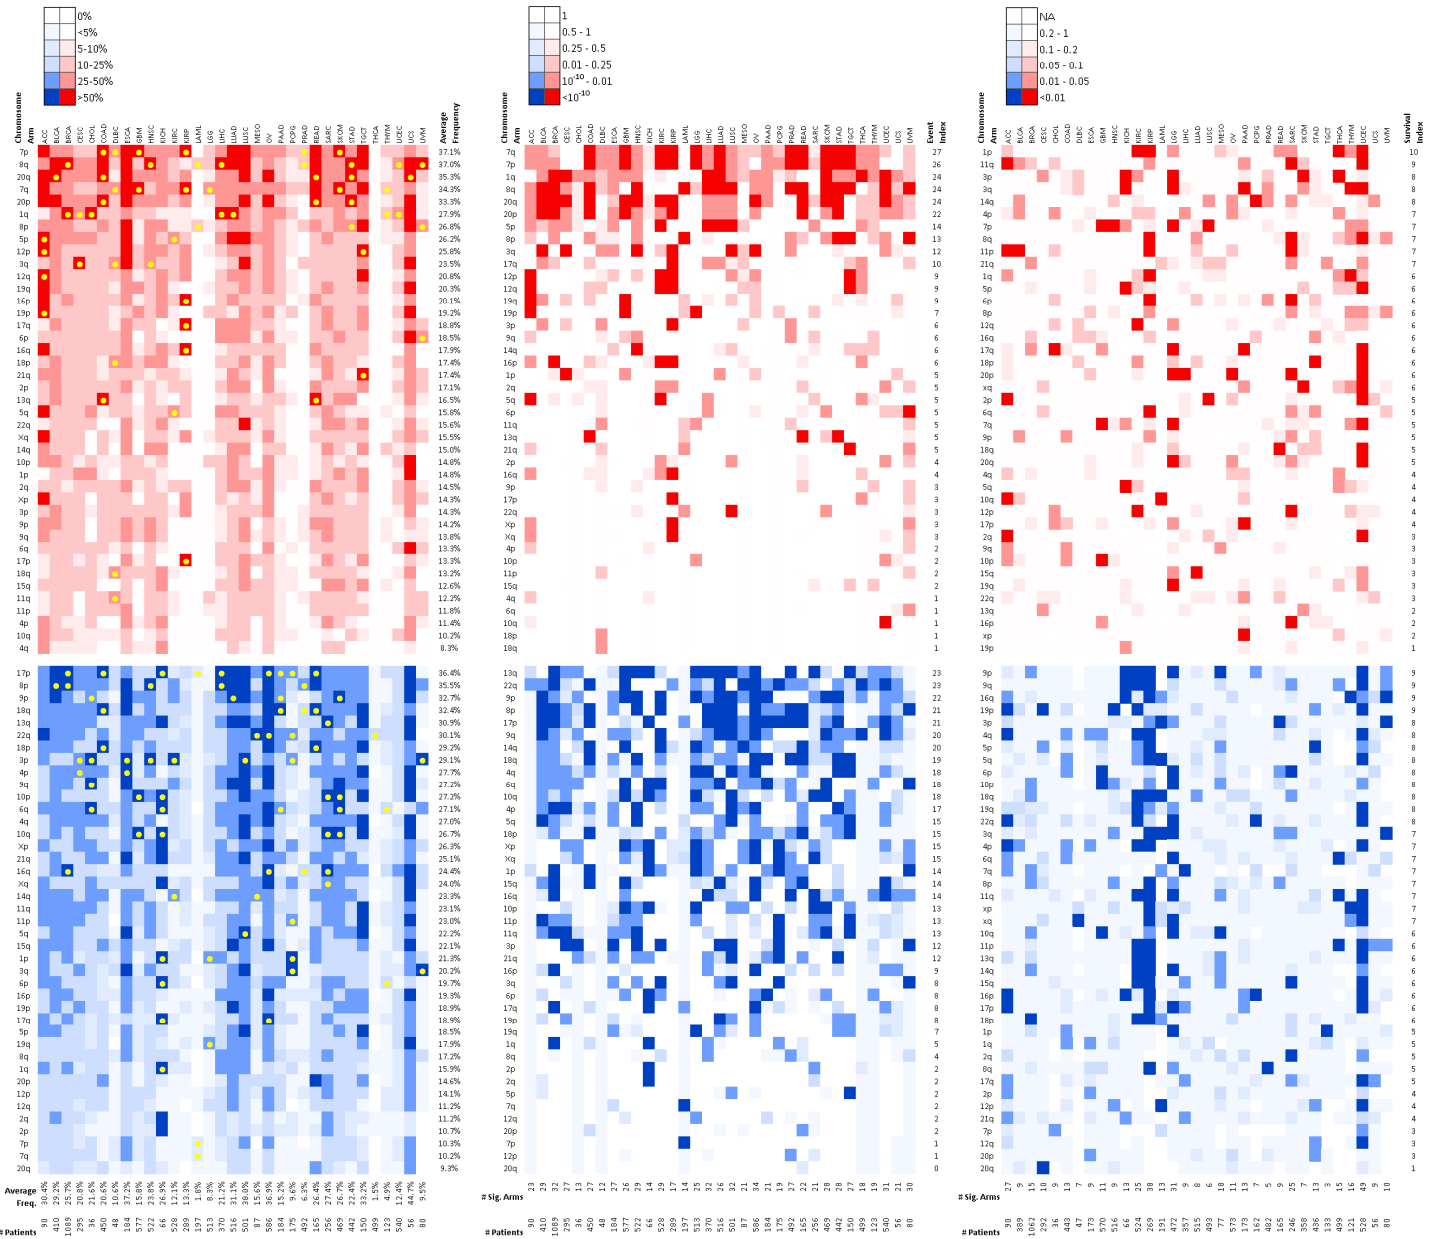

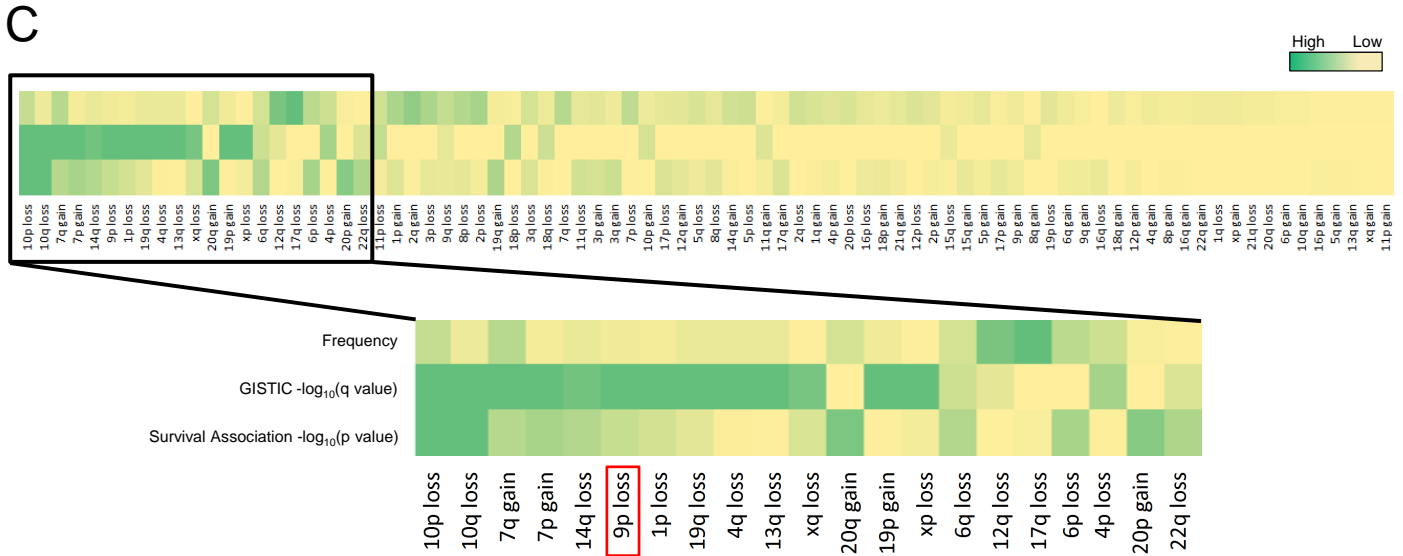

**Figure S1, related to Figure 1. Landscape of SCNA alterations and prognostic associations across cancer.**

**(A)** Data acquisition, processing, and analytical workflow for pan-cancer characterization of arm-level SCNA prognostic impact.

**(B)** Heatmaps depicting arm-level SCNA frequencies (left panel), GISTIC event q value (middle panel), and log-rank survival p value (right panel) in 33 TCGA datasets. Tumor types labeled along the top. Abbreviations established by TCGA ([tcga-data.nci.nih.gov/tcga](http://tcga-data.nci.nih.gov/tcga)). Yellow dot denotes individual arm-level SCNA frequency above background (i.e. frequency >2 standard deviations above total SCNA average frequency within each tumor type). Event Index is the number of datasets where SCNA  $q < 0.25$ . Survival Index is the number of datasets where SCNA  $p < 0.1$ .

**(C)** Two-dimensional representation of SCNA frequency, GISTIC significance  $-\log_{10}(q$  value), and log-rank overall survival association  $-\log_{10}(p$  value) in TCGA lower grade glioma (LGG).

SCNA, somatic copy number alteration; DOD, date of death; f/u, follow up; Freq, frequency; Sig, significant; NA, not available. SCNA, somatic copy number alteration. High/Low scale corresponds to the 3 parameters individually.

**Table S1, related to Figure 1. Arm-level somatic copy number alterations (SCNAs) in 33 TCGA cancer types. Provided as an Excel file.**

**A**

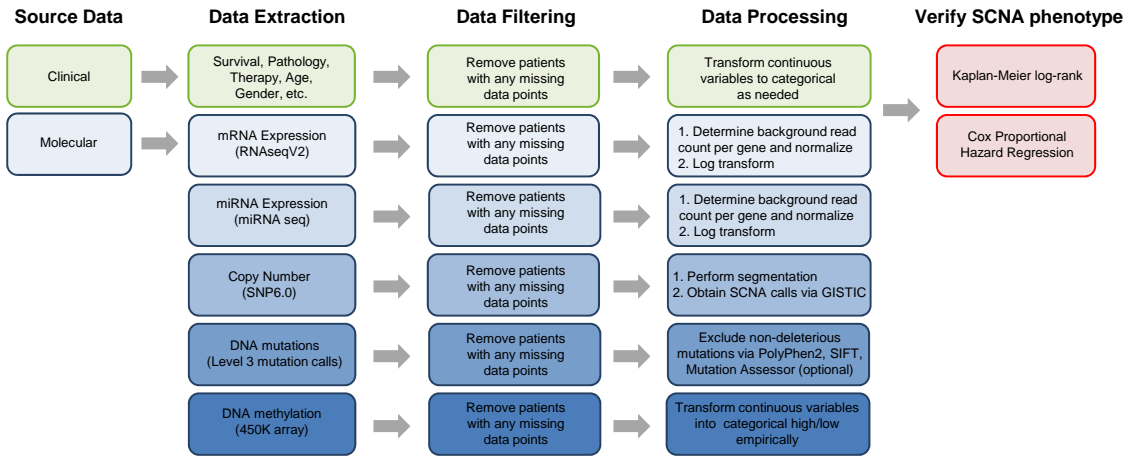

**B**

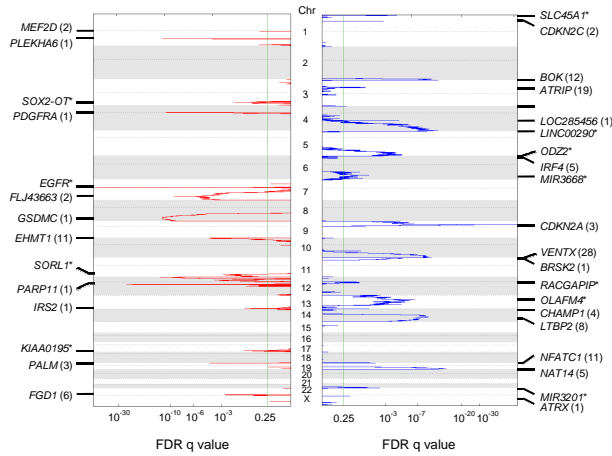

**D**

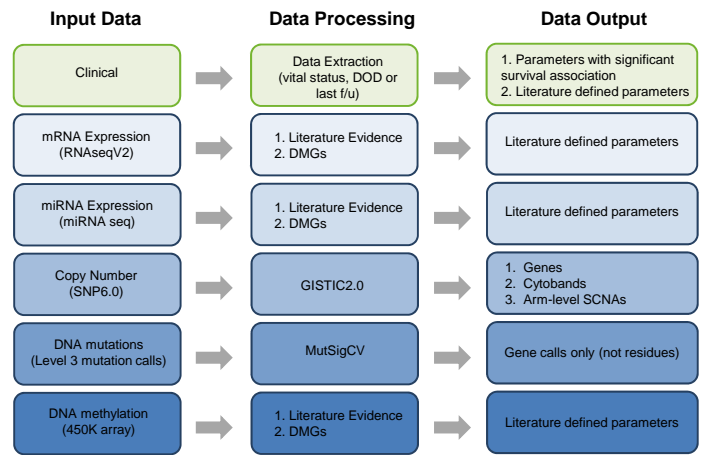

**C**

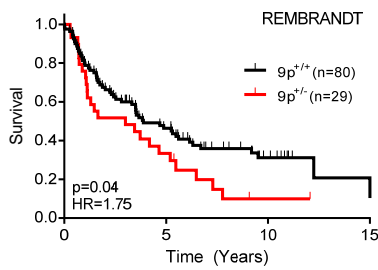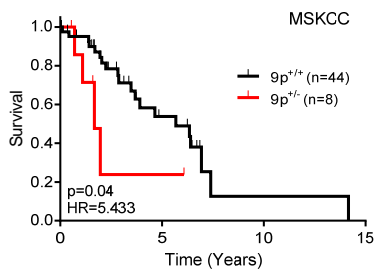

**E**

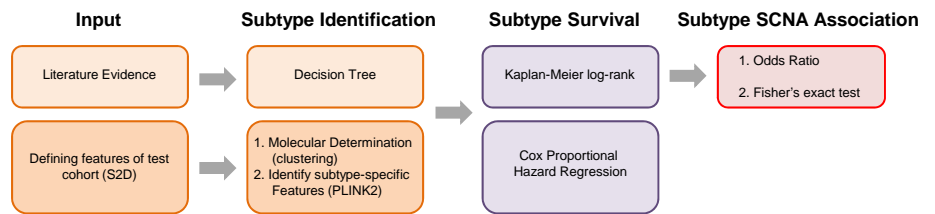

**F**

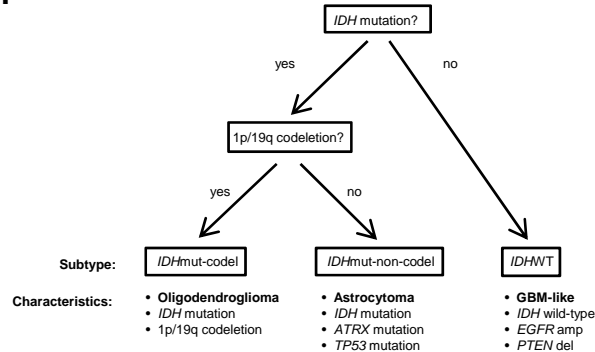

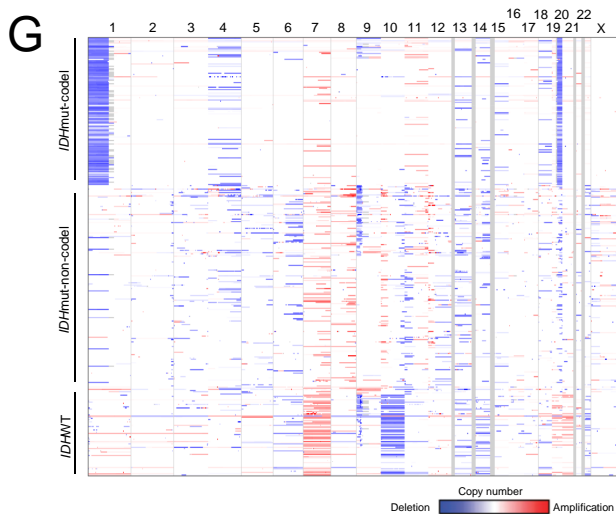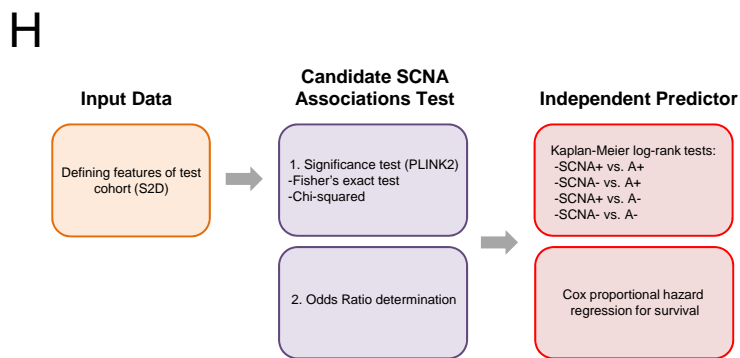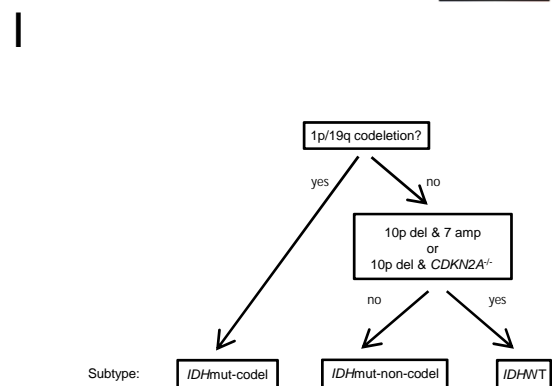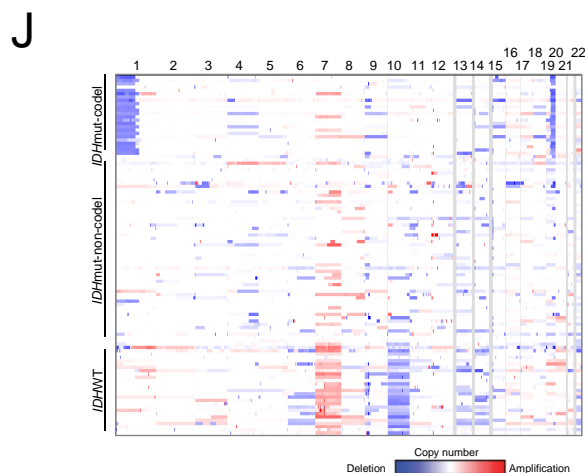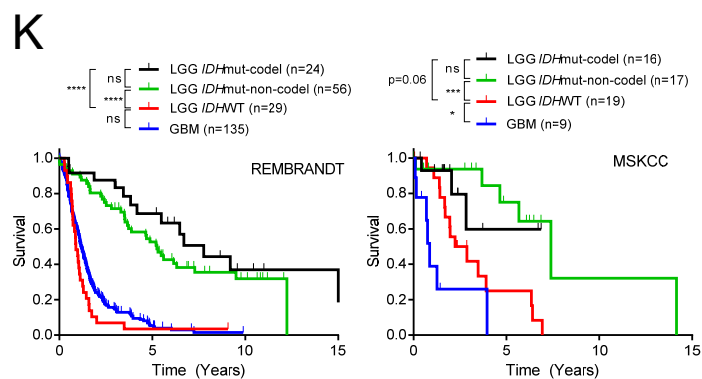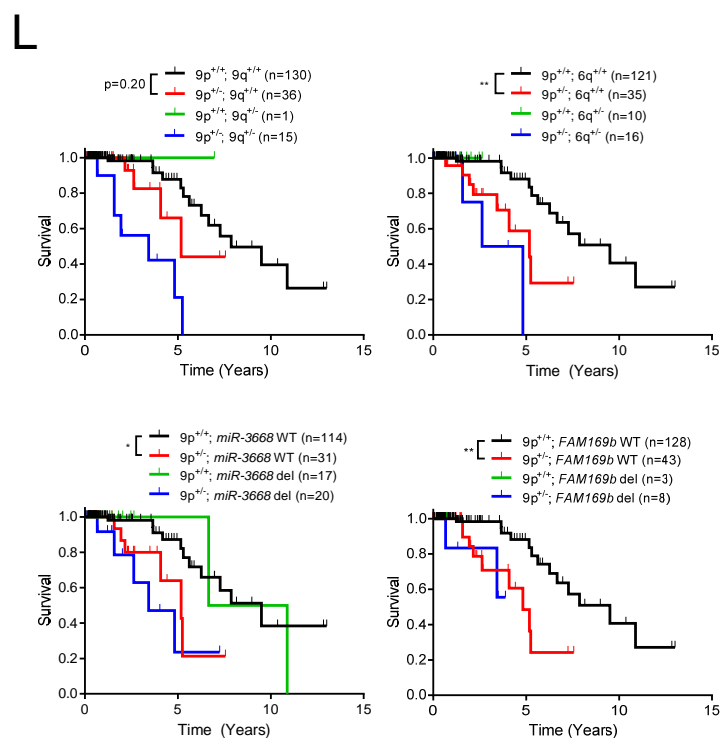

**Figure S2, related to Figure 2. An analysis of 9p loss by subtype in LGG.**

**(A)** Data acquisition, processing, and analytical workflow for data collection and establishment of test cohorts.

**(B)** Amplification (left, red) and deletion (right, blue) peaks from across the genome (y-axis) in TCGA LGG cohort via GISTIC. Known or putative gene targets within the peak regions are indicated for significant peaks (Asterisk indicates nearest gene for peaks not containing any genes). Values in parentheses represent the number of genes in the peak region. GISTIC false discovery rate (FDR) q values (x-axis) are shown. Green line denotes significance threshold ( $q < 0.25$ ).

**(C)** Kaplan-Meier curves showing survival outcome for 9p loss in REMBRANDT and MSKCC LGG cohorts.

**(D)** Data acquisition, processing, and workflow for the identification of disease-defining clinical and molecular features.

**(E)** Workflow for defining molecular subtypes of the larger disease cohort and testing for survival differences.

**(F)** Schematic of LGG subtypes according to known molecular criteria and previously published characteristics of each group (Yan et al., 2009).

**(G)** Segmentation map of all SCNAs in the TCGA LGG cohort clustered by subtype and 9p deletion status.

**(H)** Strategy for identification and elimination of potential confounding variables.

**(I)** Schematic of LGG subtypes according to copy number alteration only in TCGA LGG discovery and validation datasets.

**(J)** Segmentation map of all SCNAs in the REMBRANDT LGG cohort clustered by subtype.

**(K)** Kaplan-Meier curve showing survival outcome in REMBRANDT and MSKCC cohorts for GBM and LGG by subtype.

**(L)** Kaplan-Meier curve showing survival outcome of 9p and/or 9q, 6q, *miR-3668*, and *FAM169b* loss in *IDH*mut-non-codel subtype in the TCGA LGG cohort.

SCNA, somatic copy number alteration; LGG, lower grade glioma; GBM, glioblastoma; HR, hazard ratio; amp, amplification; del, deletion; mut, mutation; codel, codeletion; WT, wild-type; DMGs, differentially methylated genes; A, any alteration; +, present; -, absent; DEGs, differentially expressed genes. \*,  $p < 0.05$ ; \*\*,  $p < 0.01$ ; \*\*\*,  $p < 0.001$ ; \*\*\*\*,  $p < 0.0001$ ; ns, not significant.

**Table S2, related to Figure 2. Pairwise associations between significant covariates in the TCGA LGG cohort. Provided as an Excel file.**

**Table S3, related to Figure 2. Pairwise associations between 9p loss and significant covariates in the TCGA LGG cohort. Provided as an Excel file.**

A

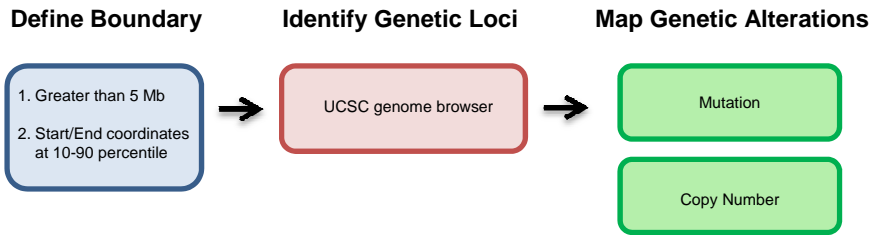

B

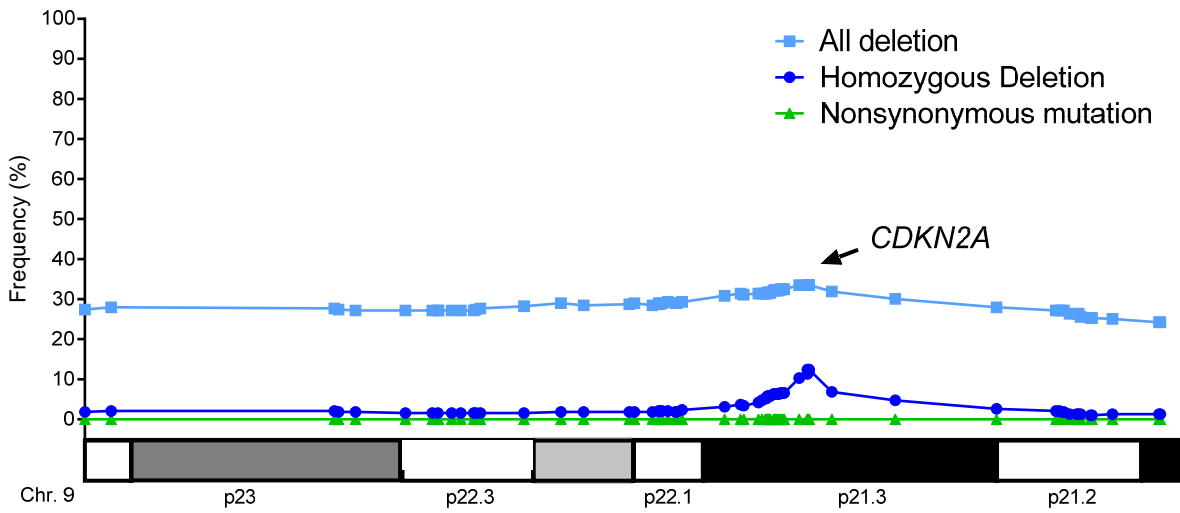

**Figure S3 related to Figure 3. Genetic alterations by locus across the 9p commonly deleted region.**

**(A)** Workflow for the characterization of individual arm-level SCNAs and their genetic features.

**(B)** Frequency of all deletion events, homozygous deletions, and nonsynonymous mutations at 72 loci within the 9p deletion in the TCGA LGG cohort.

Chr, chromosome; Mb; Megabase.

**Table S4, related to Figure 3. Genetic loci contained within the 9p commonly deleted region in LGG. Provided as an Excel file.**

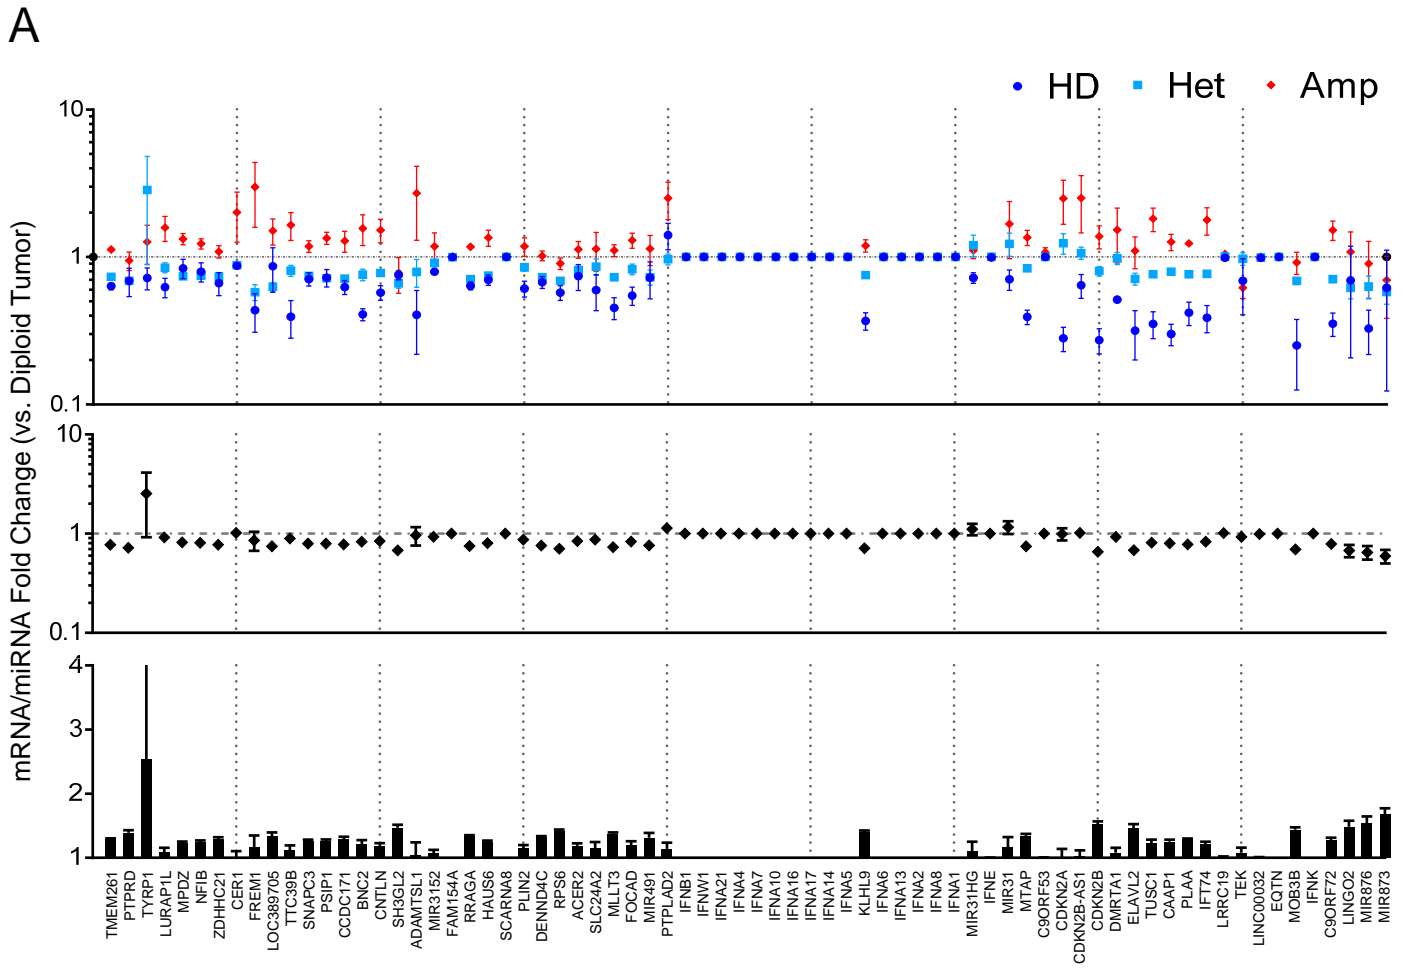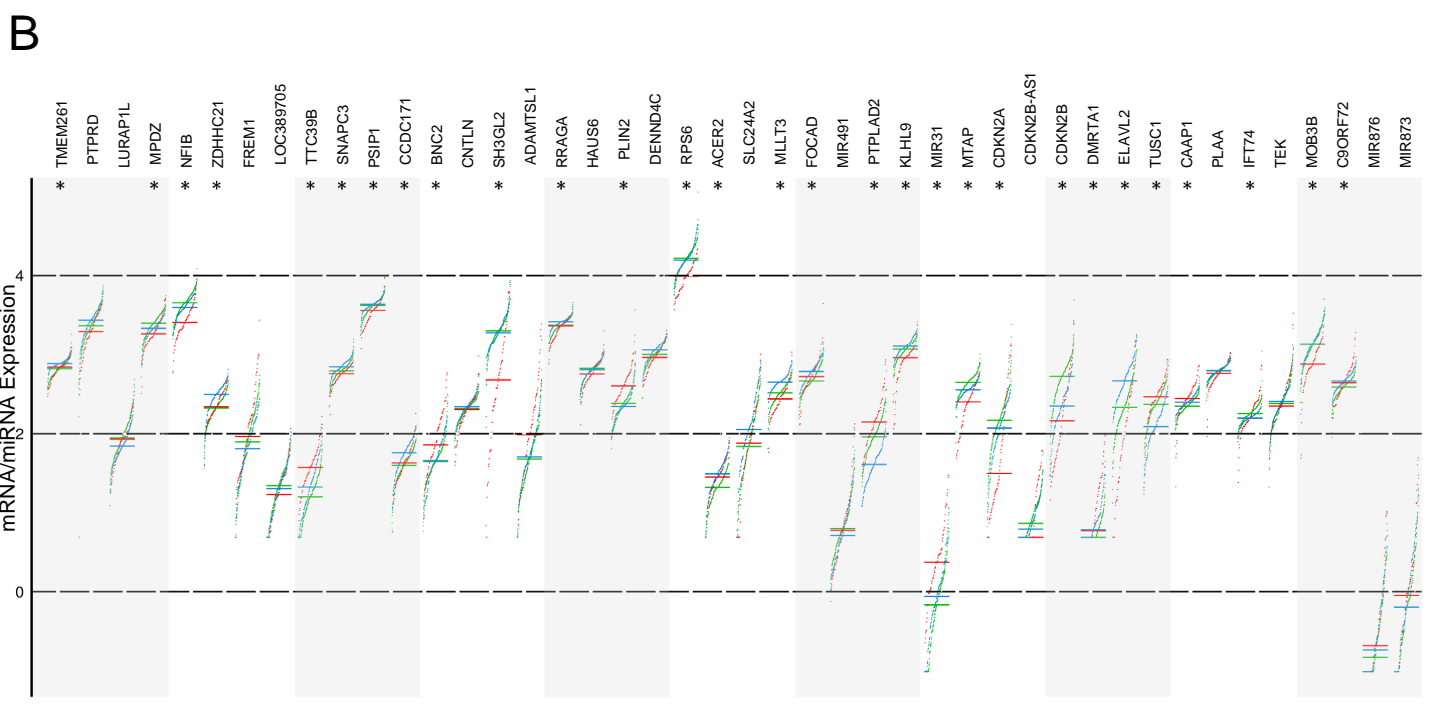

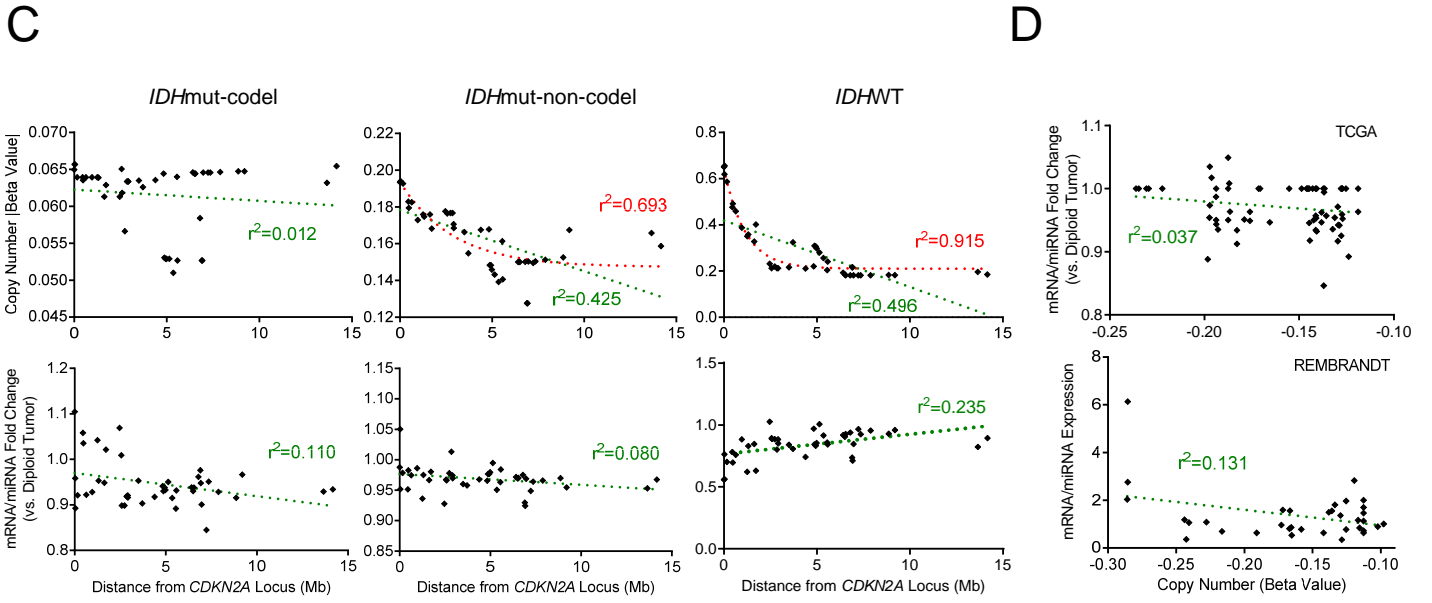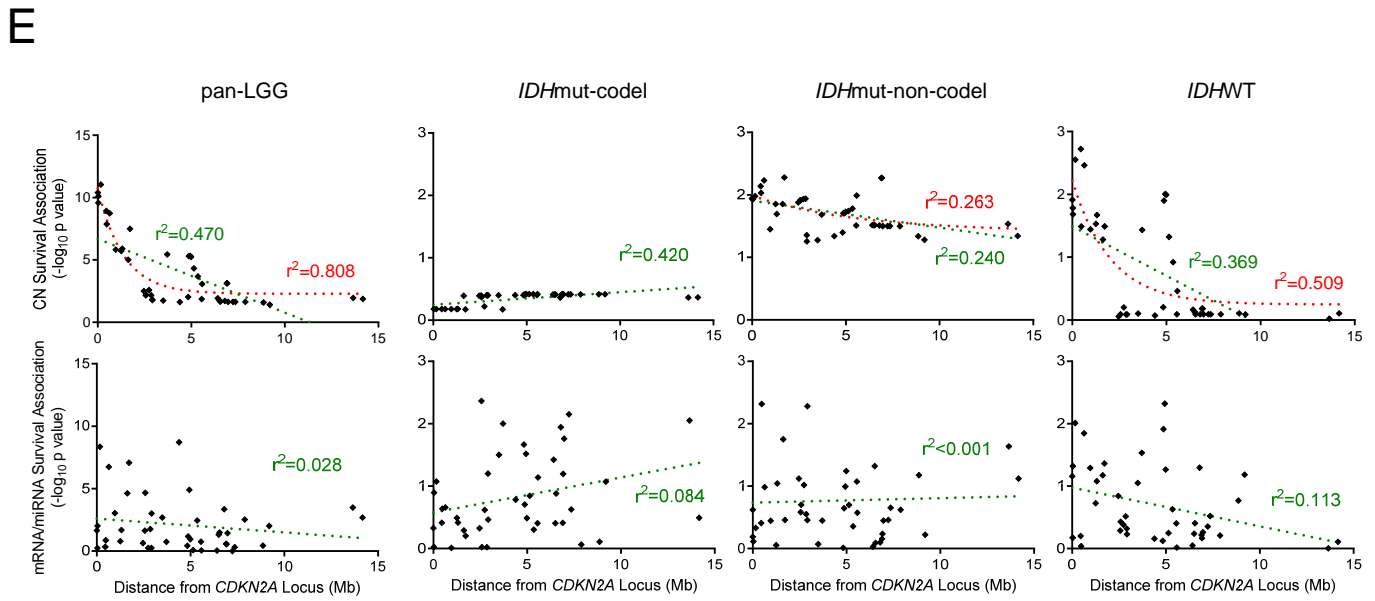



**Figure S4, related to Figure 4. Analysis of copy number status and expression by gene within the 9p commonly deleted region.**

**(A)** mRNA/miRNA expression fold change vs. diploid tumor shown based on zygosity (top panel), average fold change (middle panel), and absolute fold change (lower panel) at 72 loci within the 9p commonly deleted region in the TCGA LGG cohort. Error bars,  $\pm$  SEM.

**(B)** mRNA/miRNA expression (log read counts) in the TCGA LGG cohort by individual LGG molecular subtype. Red, *IDHW*T; Blue, *IDH*mut-codel; Green, *IDH*mut-non-codel. Colored bars represent median for each group. \*,  $p < 0.01$  (ANOVA).

**(C)** Linear (green) and logarithmic (red) regression plots of copy number (top) or mRNA/miRNA fold change (bottom) vs. distance from the *CDKN2A* locus in the TCGA LGG cohort.

**(D)** Linear regression plot of mRNA/miRNA expression vs. copy number in the TCGA and REMBRANDT LGG cohorts.

**(E)** Linear (green) and logarithmic (red) regression plots of  $-\log_{10}(p \text{ value})$  following Cox regression proportional hazard test for overall survival at 44 loci within the 9p commonly deleted region according to copy number beta value (top) or mRNA/miRNA expression (bottom) vs. distance from *CDKN2A* locus in the TCGA LGG cohort.

CN, copy number; HD, homozygous deletion; Het, heterozygous deletion; Amp, amplification; Mb, megabase; LGG, lower grade glioma.

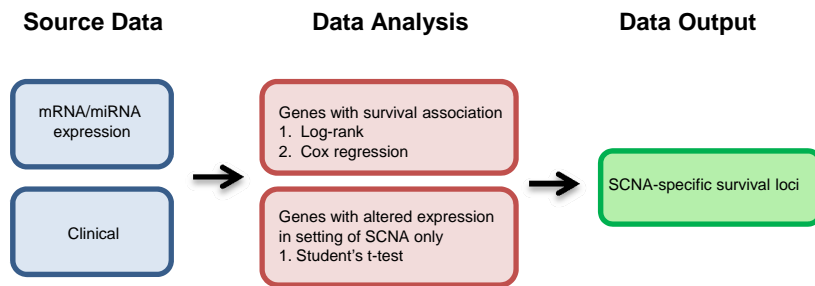

**Figure S5, related to Figure 5. Pinpointing genetic loci that are SCNA event-specific prognostic markers.**

Workflow for identifying genetic loci that are SCNA event-specific prognostic markers.

SCNA, somatic copy number alteration.

**Table S5, related to Figure 5. Univariate survival analysis of genes targeted by 9p loss. Provided as an Excel file.**

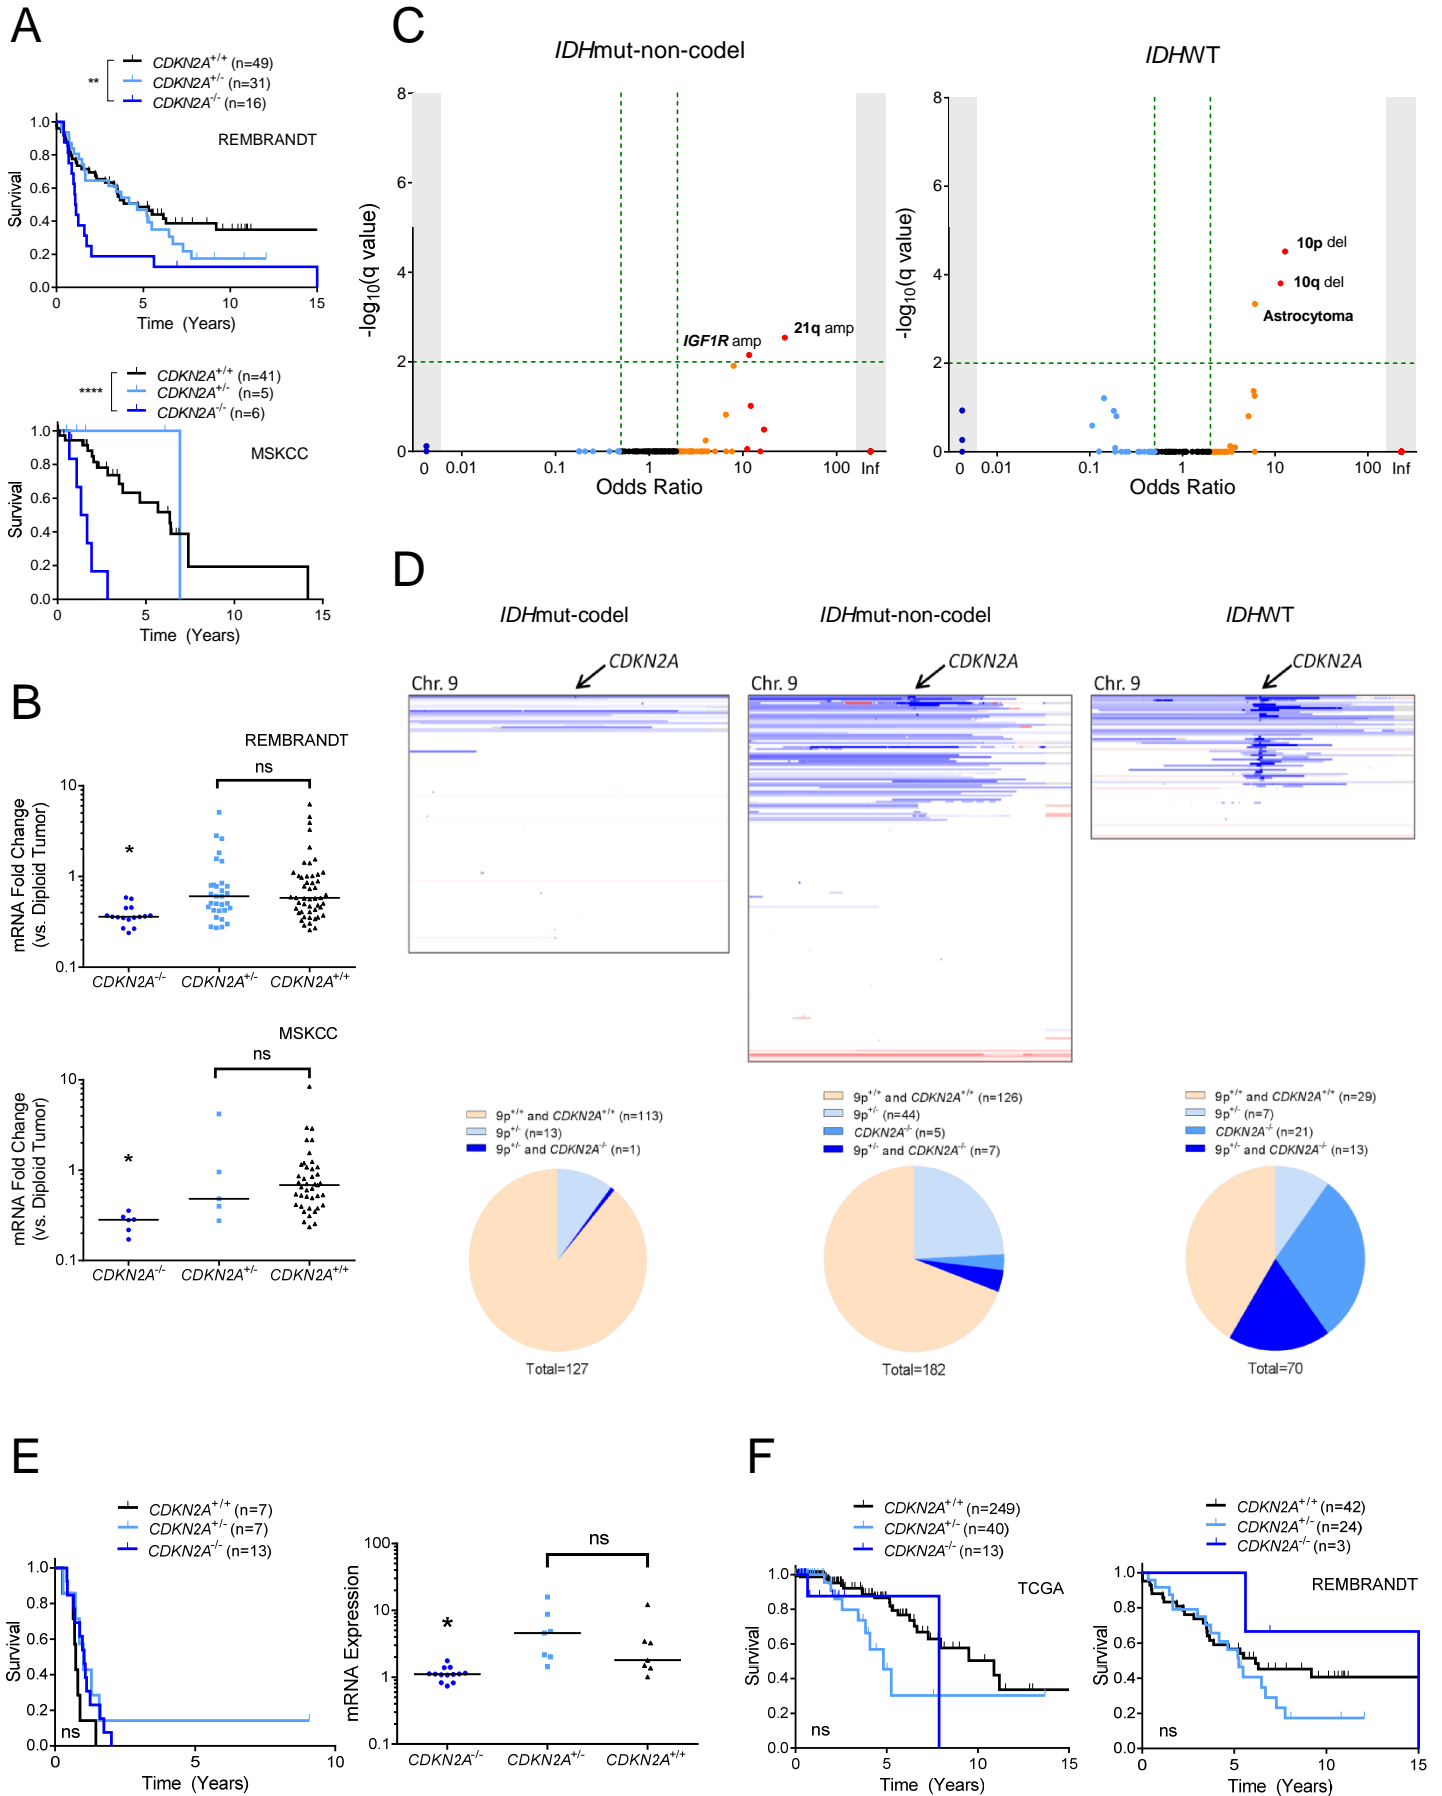

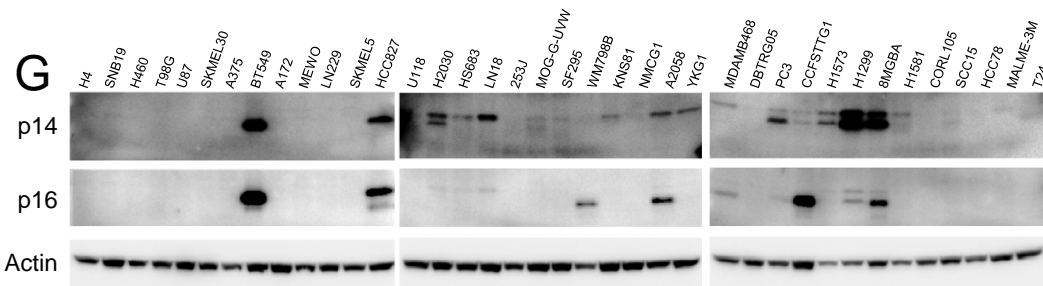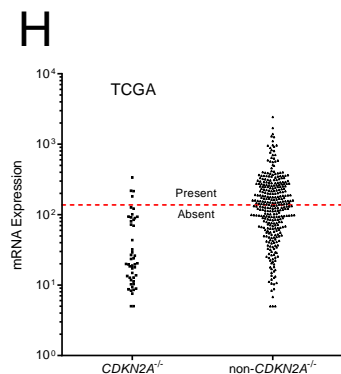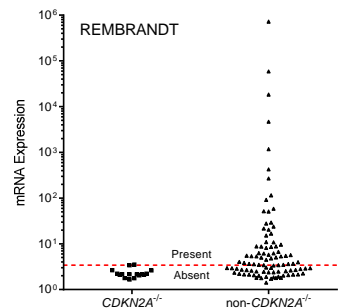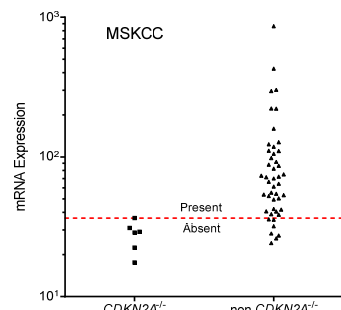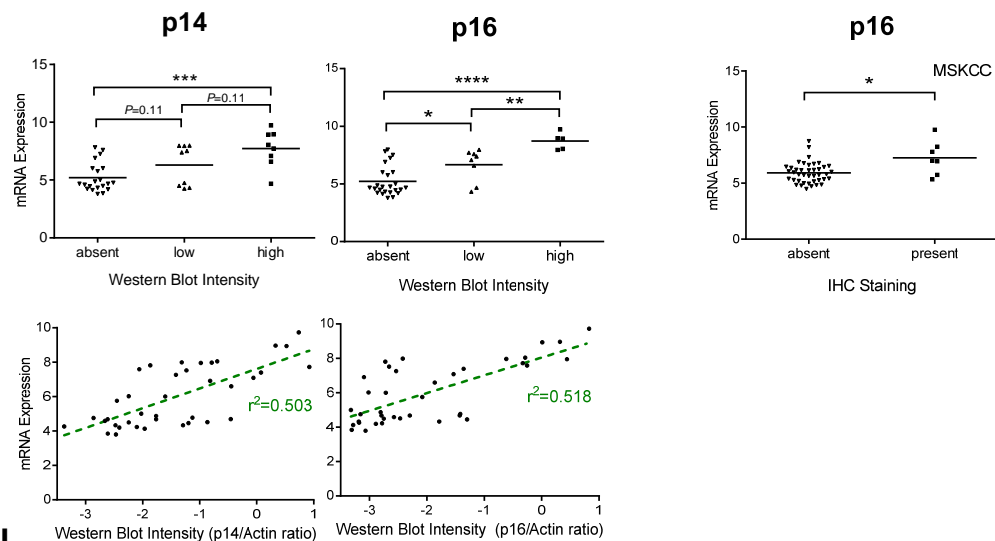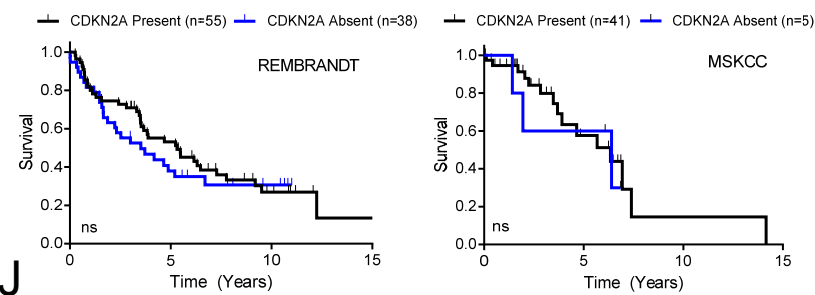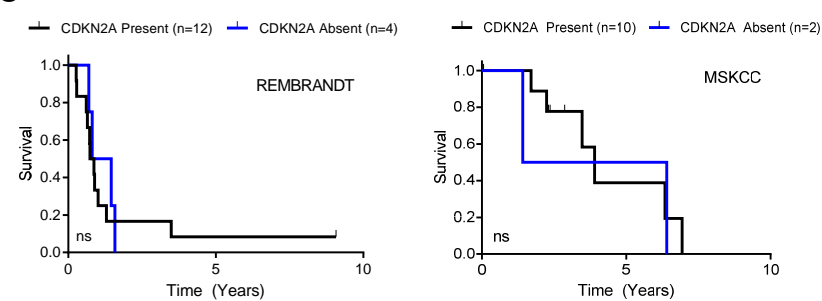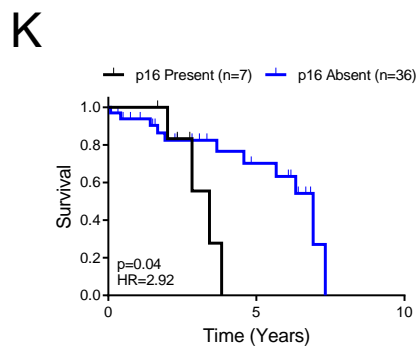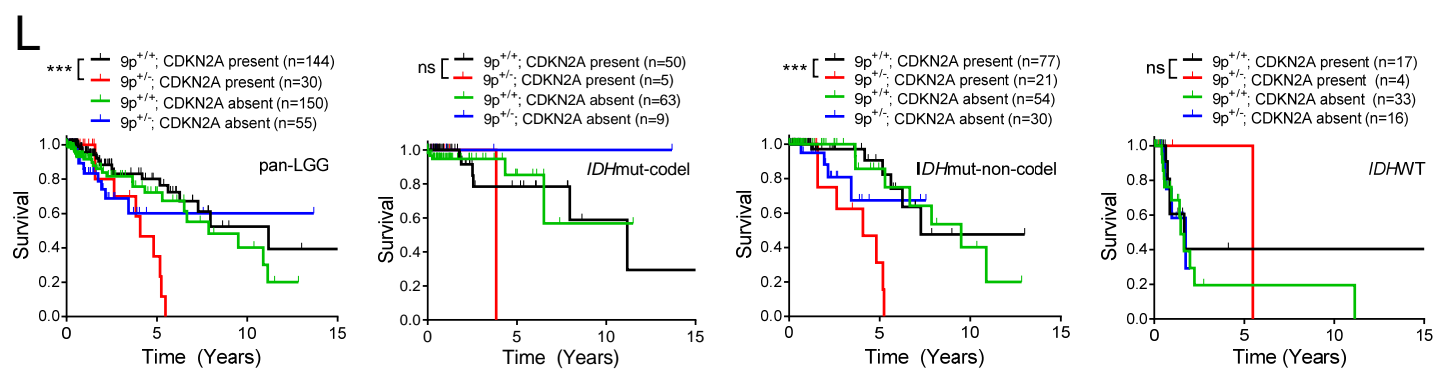

M

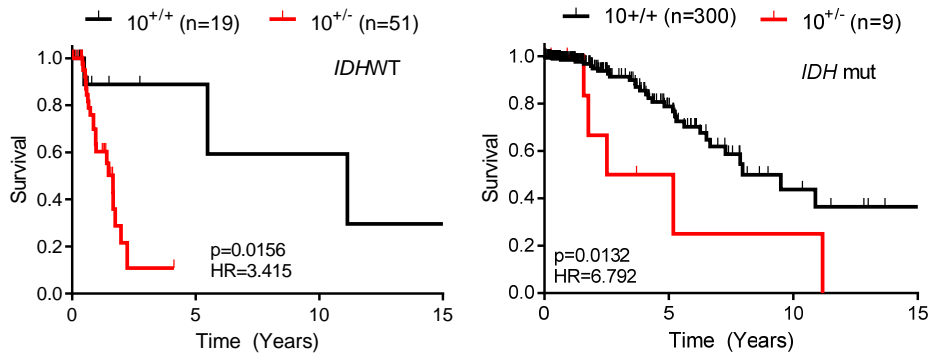

N

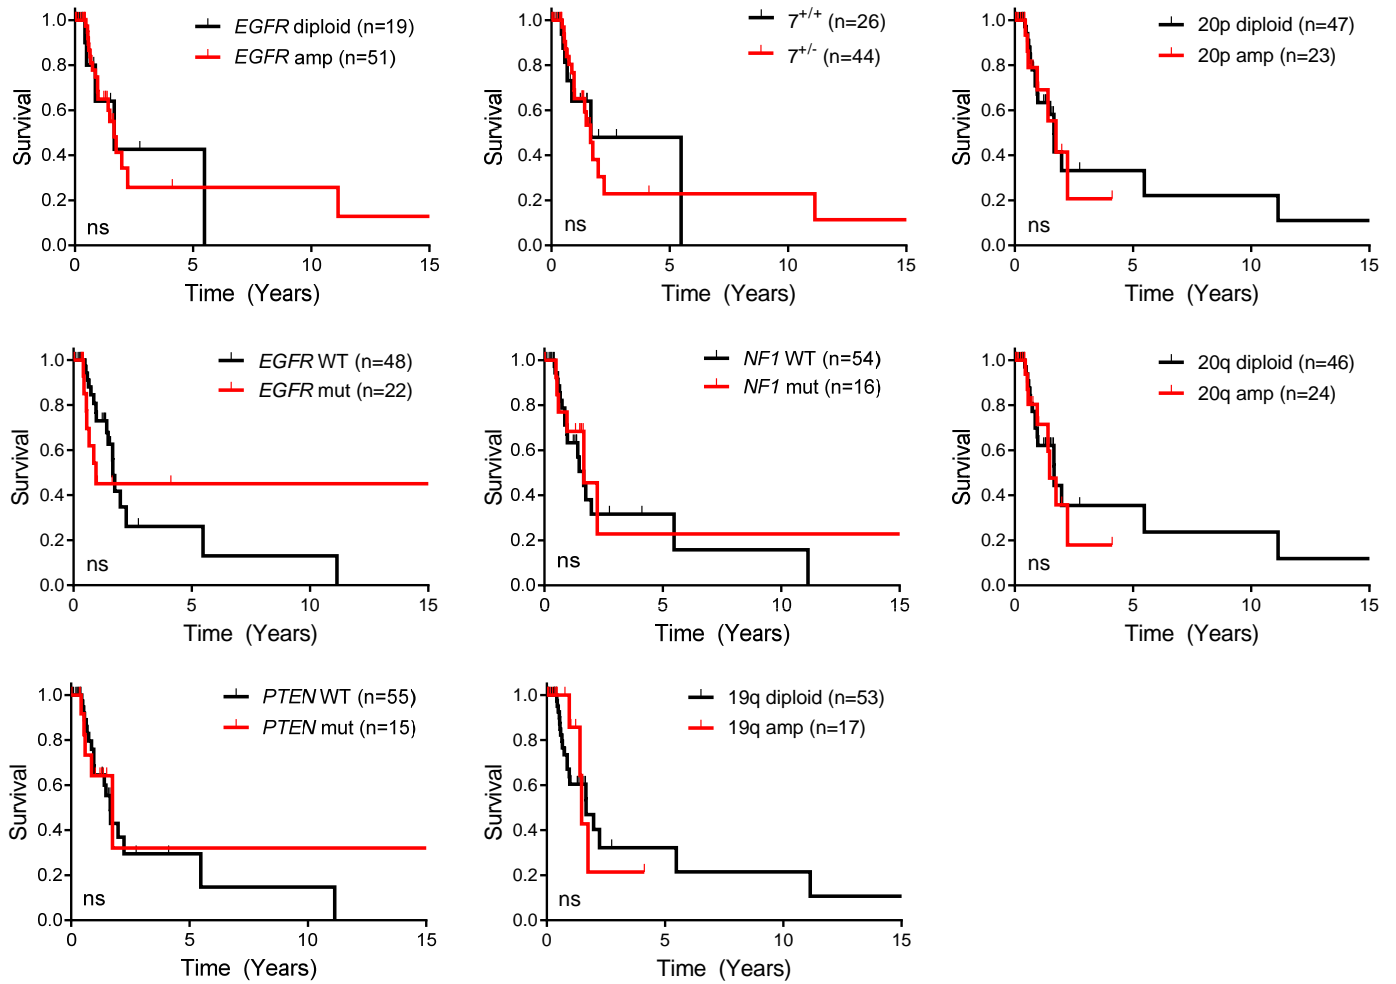

**Figure S6, related to Figure 6. Clarifying the role of *CDKN2A* in LGG.**

**(A and B)** Kaplan-Meier curve showing survival outcomes (A) and mRNA fold change (B) in both REMBRANDT and MSKCC LGG cohorts based on *CDKN2A* copy number status. Horizontal bars in (B) depict the median.

**(C)** Scatterplot showing top clinical and molecular associations with *CDKN2A* homozygous deletion in TCGA LGG subtypes *IDH*mut-non-codel and *IDH*WT. Fisher's exact test  $-\log_{10}(q \text{ value})$  (y-axis) and odds ratio (x-axis) for each association are shown.

**(D)** Segmentation map of SCNAs in the 9p commonly deleted region (top panel) and pie chart showing *CDKN2A* and 9p deletion frequencies (bottom panel) by LGG subtype in the TCGA cohort.

**(E)** Kaplan-Meier curve for survival outcomes (left panel) and mRNA expression (right panel) in REMBRANDT LGG *IDH*WT tumors based on *CDKN2A* deletion status. Horizontal bar depicts the median.

**(F)** Kaplan-Meier curve for overall survival (OS) in TCGA and REMBRANDT *IDH* mutant tumors depending on *CDKN2A* copy number status.

**(G)** Western blot of p14 and p16 in 39 cell lines (top) and corresponding association between protein and mRNA expression in cell lines (bottom left) and MSKCC patient tumors (bottom right). Horizontal bar depicts the median. Expression microarray data for cell lines was obtained from the Cancer Cell Line Encyclopedia (CCLE).

**(H)** Scatterplots showing *CDKN2A* mRNA expression in TCGA, REMBRANDT, and MSKCC LGG cohorts based on the absence or presence of *CDKN2A* homozygous deletion. Red dotted line indicates the 90<sup>th</sup> percentile for *CDKN2A* mRNA expression in *CDKN2A*<sup>-/-</sup> tumors. Expression above and below this line is considered present and absent, respectively.

**(I and J)** Kaplan-Meier curves for OS based on *CDKN2A* mRNA expression status in patients without *CDKN2A* homozygous deletion in the entire REMBRANDT and MSKCC cohorts (I) and *IDH*WT alone (J).

**(K)** Kaplan-Meier curve for OS based on p16 status in patients without *CDKN2A* homozygous deletion in the MSKCC cohort.

**(L)** Kaplan-Meier plot for OS based on 9p loss and *CDKN2A* mRNA expression.

**(M)** Kaplan-Meier curves showing survival outcome in either *IDH*WT (left panel) or *IDH* mutant patients (right panel) according to chromosome 10 copy number status in TCGA LGG cohort.

**(N)** Kaplan-Meier curves showing survival outcomes for patients with genetic alterations in TCGA LGG *IDH*WT subtype.

LGG, lower grade glioma; ns, not significant; SCNA, somatic copy number alteration; OS, overall survival; amp, amplification; del, deletion; Inf, infinite; HR, hazard ratio; WT, wild-type; mut, mutant; IHC, immunohistochemistry. \*,  $p < 0.05$ ; \*\*,  $p < 0.01$ ; \*\*\*,  $p < 0.001$ ; \*\*\*\*,  $p < 0.0001$ ; ns, not significant (Kaplan-Meier, log-rank test; *CDKN2A* mRNA expression scatterplots, Student's t-test).

**Table S6, related to Figure 6. Pairwise associations between *CDKN2A* homozygous deletion and significant covariates. Provided as an Excel file.**

**Table S7, related to Figure 6. *CDKN2A* mRNA and p14/p16 protein expression in cancer cell lines from the Cancer Cell Line Encyclopedia. Provided as an Excel file.**
